# Supplementary material
Source: PubMed Central journal article supplement (PMC8751048)
Supplement: NIHMS1760841-supplement-Table_C.pdf [file NIHMS1760841-supplement-Table_C.pdf]

**Supplementary Table 3.** Prevalence and prevalence ratio of breastfeeding initiation and breastfeeding at 1, 2, and 3 months by leave length stratified by race/Hispanic origin among women with a recent live birth who were employed during and after pregnancy<sup>a</sup>– Pregnancy Risk Assessment Monitoring System, 10 sites – 2016 to 2018

|                                                        | <b>Total</b>          | <b>Hispanic</b>                 |                                   | <b>Non-Hispanic Black</b>       |                                   | <b>Non-Hispanic White</b>       |                                   | <b>Non-Hispanic Other</b>       |                                   | <b>P</b>                 |
|--------------------------------------------------------|-----------------------|---------------------------------|-----------------------------------|---------------------------------|-----------------------------------|---------------------------------|-----------------------------------|---------------------------------|-----------------------------------|--------------------------|
|                                                        | <b>No<sup>b</sup></b> | <b>% (95% CI)<sup>c,d</sup></b> | <b>aPR (95% CI)<sup>d,e</sup></b> | <b>value<sup>f</sup></b> |
| <b>Initiated Breastfeeding, n=12,301</b>               |                       |                                 |                                   |                                 |                                   |                                 |                                   |                                 |                                   |                          |
| <i>Leave length</i>                                    |                       |                                 |                                   |                                 |                                   |                                 |                                   |                                 |                                   |                          |
| <3 months                                              | 7,866                 | 95.2 (93.1-96.7)                | 0.98 (0.96-1.01)                  | 88.5 (86.0-90.6)                | <b>0.95 (0.91-0.98)</b>           | 89.9 (88.7-91.1)                | 0.98 (0.96-1.01)                  | 88.7 (85.6-91.2)                | <b>0.92 (0.88-0.95)</b>           | 0.014                    |
| ≥3 months                                              | 4,435                 | 96.9 (95.0-98.0)                | 1.00                              | 93.7 (91.0-95.5)                | 1.00                              | 91.4 (89.5-93.1)                | 1.00                              | 96.8 (93.8-98.3)                | 1.00                              |                          |
| <b>Breastfeeding at 1 month, n=12,301</b>              |                       |                                 |                                   |                                 |                                   |                                 |                                   |                                 |                                   |                          |
| <i>Leave length</i>                                    |                       |                                 |                                   |                                 |                                   |                                 |                                   |                                 |                                   |                          |
| <3 months                                              | 7,866                 | 86.6 (83.3-89.4)                | 0.99 (0.94-1.05)                  | 77.0 (73.5-80.2)                | <b>0.90 (0.85-0.95)</b>           | 78.6 (76.9-80.2)                | <b>0.95 (0.92-0.98)</b>           | 87.3 (83.3-90.4)                | <b>0.90 (0.85-0.96)</b>           | 0.048                    |
| ≥3 months                                              | 4,435                 | 87.3 (83.3-90.4)                | 1.00                              | 85.7 (82.1-88.6)                | 1.00                              | 82.6 (80.3-84.7)                | 1.00                              | 90.6 (86.3-93.7)                | 1.00                              |                          |
| <b>Breastfeeding at 2 months, n=12,301</b>             |                       |                                 |                                   |                                 |                                   |                                 |                                   |                                 |                                   |                          |
| <i>Leave length</i>                                    |                       |                                 |                                   |                                 |                                   |                                 |                                   |                                 |                                   |                          |
| <3 months                                              | 7,866                 | 76.4 (72.3-80.1)                | 0.99 (0.92-1.07)                  | 64.8 (60.9-68.6)                | <b>0.83 (0.77-0.89)</b>           | 69.7 (67.9-71.4)                | <b>0.93 (0.90-0.97)</b>           | 72.4 (68.5-76.0)                | <b>0.88 (0.81-0.95)</b>           | 0.004                    |
| ≥3 months                                              | 4,435                 | 76.8 (72.1-81.0)                | 1.00                              | 78.5 (74.5-82.0)                | 1.00                              | 74.6 (72.0-77.0)                | 1.00                              | 82.3 (77.0-86.6)                | 1.00                              |                          |
| <b>Breastfeeding at 3 months, n=10,031<sup>g</sup></b> |                       |                                 |                                   |                                 |                                   |                                 |                                   |                                 |                                   |                          |
| <i>Leave length</i>                                    |                       |                                 |                                   |                                 |                                   |                                 |                                   |                                 |                                   |                          |
| <3 months                                              | 6,410                 | 68.6 (63.5-73.4)                | 1.03 (0.92-1.14)                  | 55.9 (51.6-60.1)                | <b>0.76 (0.69-0.83)</b>           | 63.6 (61.6-65.6)                | <b>0.92 (0.88-0.97)</b>           | 63.8 (59.1-68.2)                | <b>0.87 (0.78-0.96)</b>           | <0.001                   |
| ≥3 months                                              | 3,621                 | 66.9 (61.0-72.3)                | 1.00                              | 73.5 (69.0-77.6)                | 1.00                              | 68.8 (65.9-71.7)                | 1.00                              | 73.5 (67.4-78.9)                | 1.00                              |                          |

Note. PR = Prevalence Ratio; 95% CI = 95% Confidence Interval; aPR = Adjusted Prevalence Ratio; Boldface indicates a statistically significant result

<sup>a</sup>This analysis excluded women who did not plan to return to the same job they had during pregnancy

<sup>b</sup>Unweighted sample size

<sup>c</sup>Weighted percentage (95% Confidence Interval)

<sup>d</sup>Adjusted for type of leave, length of leave, maternal race/Hispanic origin, age, education, marital status, household income by federal poverty level, parity, infant gestational age, timing of survey completion and PRAMS site

<sup>e</sup>We constructed separate multivariable survey-weighted logistic regression models to examine the association between each breastfeeding outcome by each race/Hispanic origin group between women who reported <3 months of leave and those reporting ≥3 months of leave. The reference group for each model was ≥3 months of leave.

<sup>f</sup>P value based on F test for 2-way interaction between leave length and race/Hispanic origin.

<sup>g</sup>Sample was restricted to those who had completed their PRAMS survey at or after 3 months postpartum
